# Supplementary material for: Real world evidence on gemcitabine and nab-paclitaxel combination chemotherapy in advanced pancreatic cancer
Source: Springer Nature journal article supplement (doi:10.1186/s12885-018-5244-2), 2019-01-08
Supplement: MOESM1 [file 16385144]

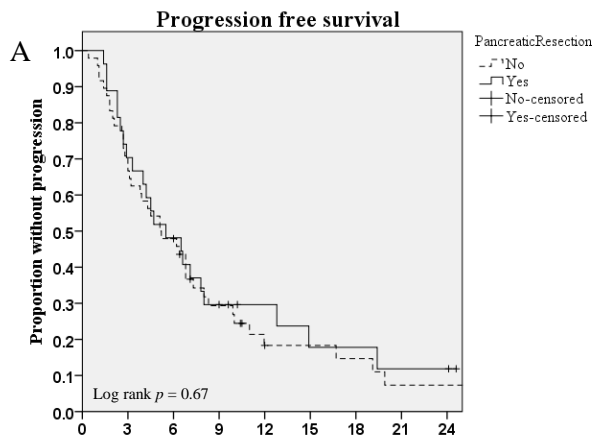

|            |    | Months |    |    |   |    |    |    |    |    |
|------------|----|--------|----|----|---|----|----|----|----|----|
|            |    | 0      | 3  | 6  | 9 | 12 | 15 | 18 | 21 | 24 |
| N at risk: | 48 | 32     | 26 | 12 | 5 | 5  | 4  | 2  | 2  |    |
|            | 27 | 19     | 13 | 7  | 5 | 3  | 3  | 2  | 2  |    |

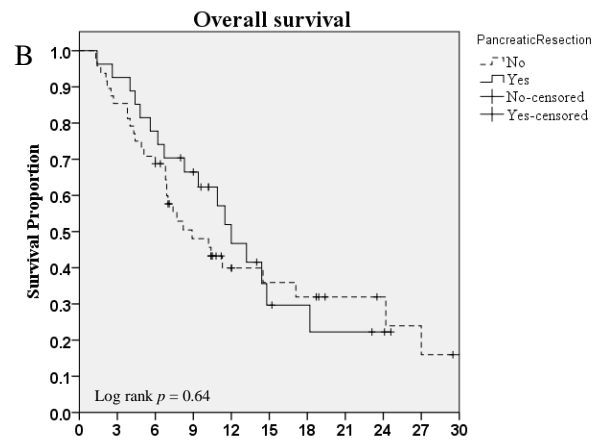

|            |    | Months |    |    |    |    |    |    |    |    |    |    |
|------------|----|--------|----|----|----|----|----|----|----|----|----|----|
|            |    | 0      | 3  | 6  | 9  | 12 | 15 | 18 | 21 | 24 | 27 | 30 |
| N at risk: | 48 | 41     | 32 | 20 | 11 | 9  | 8  | 5  | 4  | 2  | 1  |    |
|            | 27 | 25     | 21 | 16 | 9  | 5  | 4  | 3  | 2  | 0  | 0  |    |
