# Supplementary material for: Real world evidence on gemcitabine and nab-paclitaxel combination chemotherapy in advanced pancreatic cancer
Source: Springer Nature journal article supplement (doi:10.1186/s12885-018-5244-2), 2019-01-08

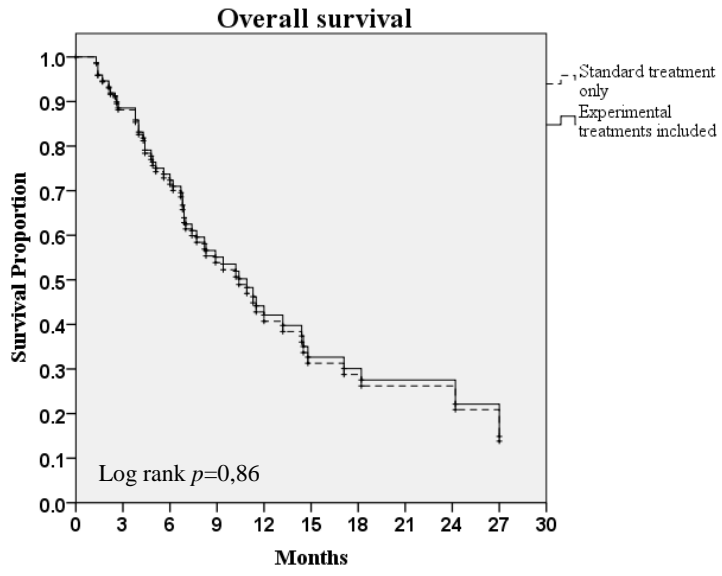

Supplement: MOESM3 [file 16385144]
